# Supplementary material for: Association of Individual and Community Factors With Hepatitis C Infections Among Pregnant People and Newborns
Source: PubMed Central journal article supplement (PMC8727040; doi:10.1001/jamahealthforum.2021.3470), 2021-10-29

## Supplemental Online Content

Patrick SW, Dupont WD, McNeer E, et al. Association of Individual and Community Factors With Hepatitis C Infections Among Pregnant People and Newborns. *JAMA Health Forum*. 2021;2(10):e213470. doi:10.1001/jamahealthforum.2021.3470

**eFigure 1.** Rate of HCV Among Pregnant People By Race and Education-Level, US 2009-2019

**eTable 1.** Multivariable Analysis of County Factors Associated with Modifying HCV Risk Over Time among High-Risk Pregnant People

**eTable 2.** Predicted Probability of Hepatitis C Infection among Non-Hispanic White and American Indian or Alaskan Native Women without a 4-Year Degree by County Characteristics, 2009-2019

**eFigure 2.** County Geographic Variation in Hepatitis C Infections Among Pregnant People, US 2009

**eFigure 3.** County Geographic Variation in Hepatitis C Infections Among Pregnant People, US 2010

**eFigure 4.** County Geographic Variation in Hepatitis C Infections Among Pregnant People, US 2011

**eFigure 5.** County Geographic Variation in Hepatitis C Infections Among Pregnant People, US 2012

**eFigure 6.** County Geographic Variation in Hepatitis C Infections Among Pregnant People, US 2013

**eFigure 7.** County Geographic Variation in Hepatitis C Infections Among Pregnant People, US 2014

**eFigure 8.** County Geographic Variation in Hepatitis C Infections Among Pregnant People, US 2015

**eFigure 9.** County Geographic Variation in Hepatitis C Infections Among Pregnant People, US 2016

**eFigure 10.** County Geographic Variation in Hepatitis C Infections Among Pregnant People, US 2017

**eFigure 11.** County Geographic Variation in Hepatitis C Infections Among Pregnant People, US 2018

This supplemental material has been provided by the authors to give readers additional information about their work.

**eFigure 1.** Rate of HCV Among Pregnant People By Race and Education-Level, US 2009-2019.

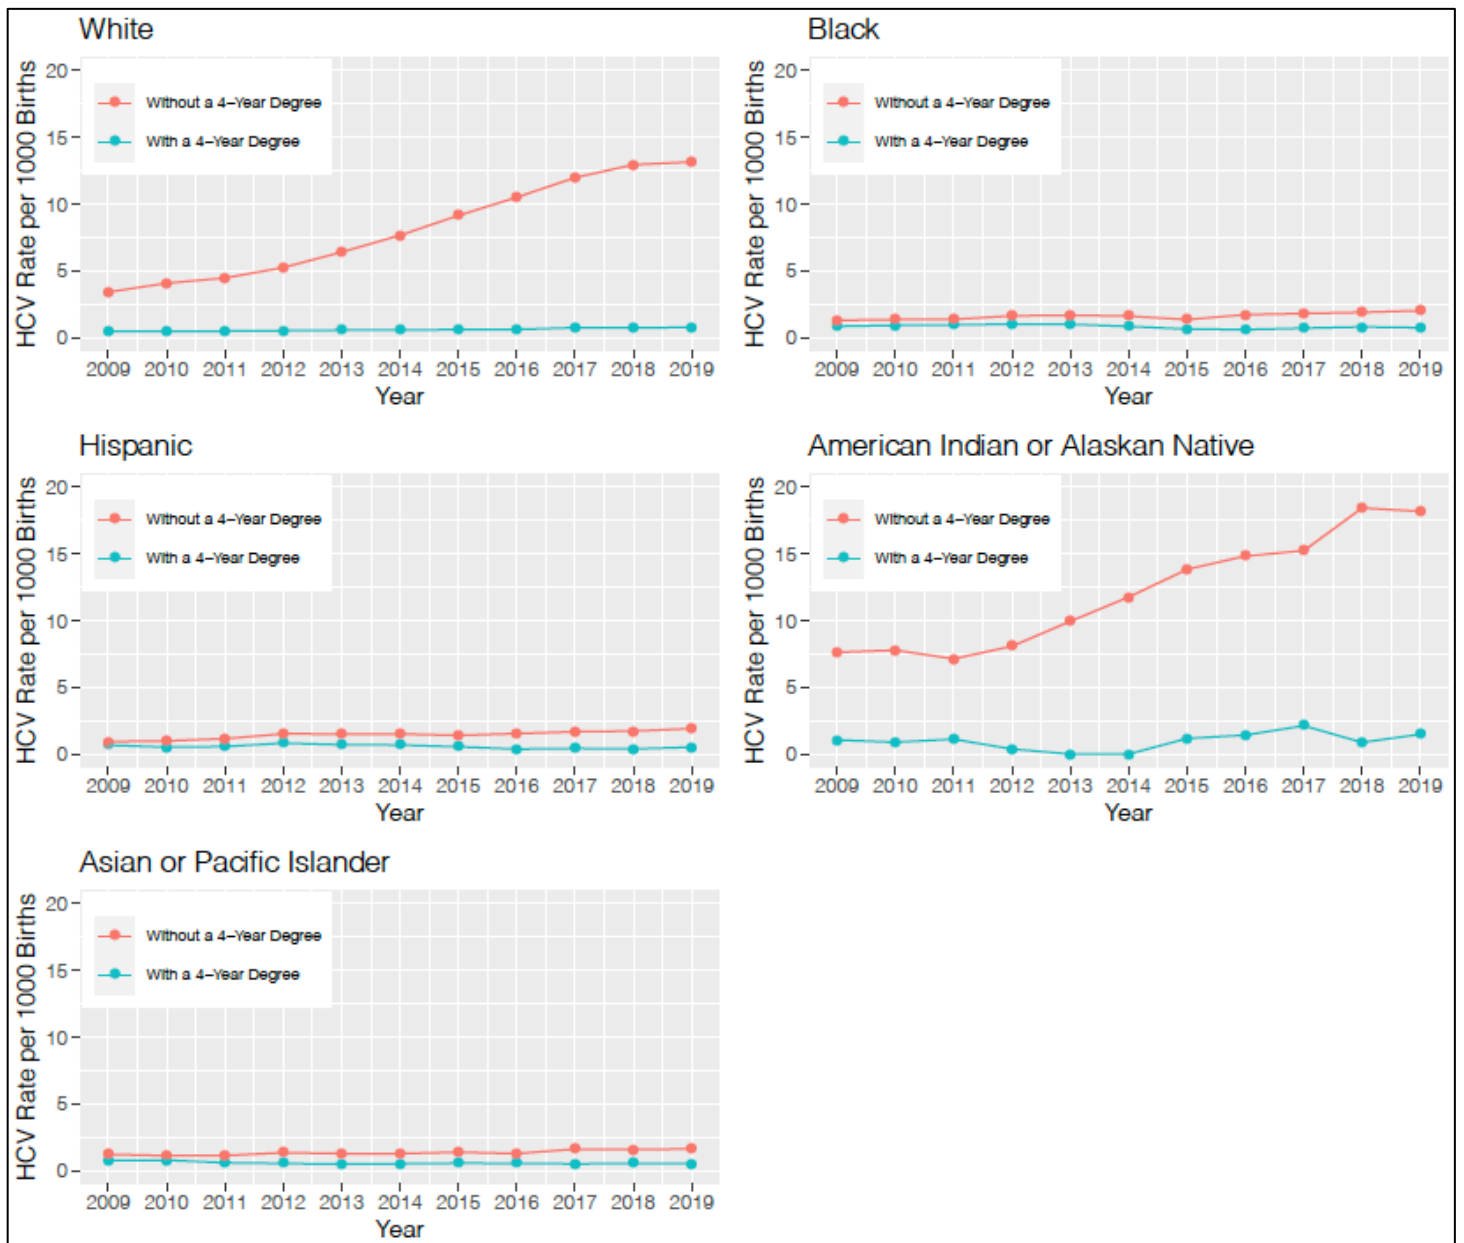

**eTable 1.** Multivariable Analysis of County Factors Associated with Modifying HCV Risk Over Time among High-Risk Pregnant People.

|                                        |                   | <b>Model Including Only White and American Indian or Alaskan Native People without a 4-year Degree</b><br>OR (95% C.I.) |
|----------------------------------------|-------------------|-------------------------------------------------------------------------------------------------------------------------|
| <b>Year'</b>                           |                   | 1.89 (1.67 – 2.13)                                                                                                      |
| <b>Year''</b>                          |                   | 0.42 (0.32 – 0.56)                                                                                                      |
| <b>Year'''</b>                         |                   | 8.96 (3.40 – 23.61)                                                                                                     |
| <b>Individual Characteristics</b>      |                   |                                                                                                                         |
| <b>Previous births</b>                 |                   | 1.30 (1.30 – 1.31)                                                                                                      |
| <b>Payment</b>                         |                   |                                                                                                                         |
|                                        | Private Insurance | Reference                                                                                                               |
|                                        | Medicaid          | 3.69 (3.62 – 3.77)                                                                                                      |
|                                        | Self-Pay          | 2.29 (2.19 – 2.39)                                                                                                      |
|                                        | Other             | 3.35 (3.23 – 3.48)                                                                                                      |
| <b>Marital Status</b>                  |                   |                                                                                                                         |
|                                        | Married           | Reference                                                                                                               |
|                                        | Unmarried         | 2.94 (2.89 – 2.98)                                                                                                      |
| <b>County Characteristics</b>          |                   |                                                                                                                         |
| <b>Rurality</b>                        |                   |                                                                                                                         |
|                                        | Urban             | Reference                                                                                                               |
|                                        | Rural Adjacent    | 0.82 (0.74 – 0.92)                                                                                                      |
|                                        | Rural Remote      | 0.92 (0.81 – 1.05)                                                                                                      |
| <b>Employed per 1,000</b>              |                   | 1.00 (1.00 – 1.00)                                                                                                      |
| <b>Obstetricians per 1,000</b>         |                   | 0.92 (0.57 – 1.46)                                                                                                      |
| <b>Interactions</b>                    |                   |                                                                                                                         |
| <b>Rurality*Year'</b>                  |                   |                                                                                                                         |
|                                        | Rural Adjacent    | 1.01 (0.97 – 1.05)                                                                                                      |
|                                        | Rural Remote      | 0.97 (0.93 – 1.01)                                                                                                      |
| <b>Rurality*Year''</b>                 |                   |                                                                                                                         |
|                                        | Rural Adjacent    | 0.98 (0.90 – 1.07)                                                                                                      |
|                                        | Rural Remote      | 1.02 (0.92 – 1.12)                                                                                                      |
| <b>Rurality*Year'''</b>                |                   |                                                                                                                         |
|                                        | Rural Adjacent    | 1.07 (0.78 – 1.47)                                                                                                      |
|                                        | Rural Remote      | 0.96 (0.67 – 1.37)                                                                                                      |
| <b>Employed per 1,000*Year'</b>        |                   | 1.00 (1.00 – 1.00)                                                                                                      |
| <b>Employed per 1,000*Year''</b>       |                   | 1.00 (1.00 – 1.00)                                                                                                      |
| <b>Employed per 1,000*Year'''</b>      |                   | 0.99 (0.99 – 1.00)                                                                                                      |
| <b>Obstetricians per 1,000*Year'</b>   |                   | 1.07 (0.92 – 1.23)                                                                                                      |
| <b>Obstetricians per 1,000*Year''</b>  |                   | 0.83 (0.61 – 1.14)                                                                                                      |
| <b>Obstetricians per 1,000*Year'''</b> |                   | 1.44 (0.47 – 4.44)                                                                                                      |

**eTable 2.** Predicted Probability of Hepatitis C Infection among Non-Hispanic White and American Indian or Alaskan Native People without a 4-Year Degree by County Characteristics, 2009-2019.

|                          |                             | 2009<br>%<br>(95%CI)   | 2010<br>%<br>(95%CI)   | 2011<br>%<br>(95%CI)   | 2012<br>%<br>(95%CI)   | 2013<br>%<br>(95%CI)   | 2014<br>%<br>(95%CI)   | 2015<br>%<br>(95%CI)   | 2016<br>%<br>(95%CI)   | 2017<br>%<br>(95%CI)   | 2018<br>%<br>(95%CI)   | 2019<br>%<br>(95%CI)   |
|--------------------------|-----------------------------|------------------------|------------------------|------------------------|------------------------|------------------------|------------------------|------------------------|------------------------|------------------------|------------------------|------------------------|
| <b>Rurality</b>          | Rural Remote                | 0.24%<br>(0.18%-0.31%) | 0.27%<br>(0.21%-0.32%) | 0.29%<br>(0.24%-0.34%) | 0.31%<br>(0.27%-0.36%) | 0.34%<br>(0.31%-0.38%) | 0.38%<br>(0.34%-0.41%) | 0.41%<br>(0.37%-0.45%) | 0.46%<br>(0.41%-0.50%) | 0.50%<br>(0.43%-0.57%) | 0.56%<br>(0.46%-0.65%) | 0.62%<br>(0.50%-0.75%) |
|                          | Rural Adjacent              | 0.20%<br>(0.16%-0.25%) | 0.23%<br>(0.19%-0.27%) | 0.26%<br>(0.22%-0.30%) | 0.29%<br>(0.26%-0.32%) | 0.33%<br>(0.30%-0.36%) | 0.38%<br>(0.35%-0.40%) | 0.43%<br>(0.40%-0.46%) | 0.49%<br>(0.44%-0.54%) | 0.56%<br>(0.50%-0.63%) | 0.65%<br>(0.55%-0.75%) | 0.75%<br>(0.61%-0.88%) |
|                          | Urban                       | 0.25%<br>(0.23%-0.28%) | 0.28%<br>(0.26%-0.31%) | 0.32%<br>(0.29%-0.34%) | 0.35%<br>(0.33%-0.38%) | 0.40%<br>(0.37%-0.43%) | 0.45%<br>(0.42%-0.48%) | 0.51%<br>(0.48%-0.54%) | 0.58%<br>(0.54%-0.62%) | 0.66%<br>(0.61%-0.71%) | 0.75%<br>(0.69%-0.82%) | 0.86%<br>(0.78%-0.95%) |
| <b>Employment Rate</b>   | 10 <sup>th</sup> Percentile | 0.16%<br>(0.14%-0.18%) | 0.19%<br>(0.17%-0.21%) | 0.24%<br>(0.21%-0.26%) | 0.30%<br>(0.27%-0.32%) | 0.37%<br>(0.35%-0.40%) | 0.47%<br>(0.43%-0.51%) | 0.59%<br>(0.54%-0.64%) | 0.73%<br>(0.66%-0.80%) | 0.90%<br>(0.80%-1.01%) | 1.11%<br>(0.97%-1.26%) | 1.37%<br>(1.16%-1.58%) |
|                          | 90 <sup>th</sup> Percentile | 0.36%<br>(0.30%-0.43%) | 0.33%<br>(0.29%-0.37%) | 0.35%<br>(0.32%-0.39%) | 0.37%<br>(0.34%-0.41%) | 0.39%<br>(0.36%-0.42%) | 0.41%<br>(0.38%-0.44%) | 0.43%<br>(0.40%-0.46%) | 0.44%<br>(0.41%-0.48%) | 0.46%<br>(0.42%-0.50%) | 0.47%<br>(0.42%-0.52%) | 0.48%<br>(0.42%-0.54%) |
| <b>Obstetrician Rate</b> | 10 <sup>th</sup> Percentile | 0.26%<br>(0.22%-0.31%) | 0.29%<br>(0.25%-0.33%) | 0.32%<br>(0.29%-0.36%) | 0.36%<br>(0.32%-0.39%) | 0.40%<br>(0.37%-0.43%) | 0.44%<br>(0.41%-0.47%) | 0.50%<br>(0.46%-0.53%) | 0.56%<br>(0.52%-0.60%) | 0.63%<br>(0.57%-0.68%) | 0.71%<br>(0.64%-0.78%) | 0.80%<br>(0.71%-0.90%) |
|                          | 90 <sup>th</sup> Percentile | 0.25%<br>(0.22%-0.27%) | 0.27%<br>(0.25%-0.30%) | 0.30%<br>(0.28%-0.33%) | 0.34%<br>(0.32%-0.37%) | 0.38%<br>(0.36%-0.41%) | 0.43%<br>(0.41%-0.46%) | 0.49%<br>(0.46%-0.52%) | 0.56%<br>(0.52%-0.59%) | 0.63%<br>(0.59%-0.68%) | 0.72%<br>(0.67%-0.78%) | 0.83%<br>(0.75%-0.90%) |

\*After accounting for year, previous births, payment source, marital status, interactions between county characteristics and year.

**eFigure 2.** County Geographic Variation in Hepatitis C Infections Among Pregnant People, US 2009.

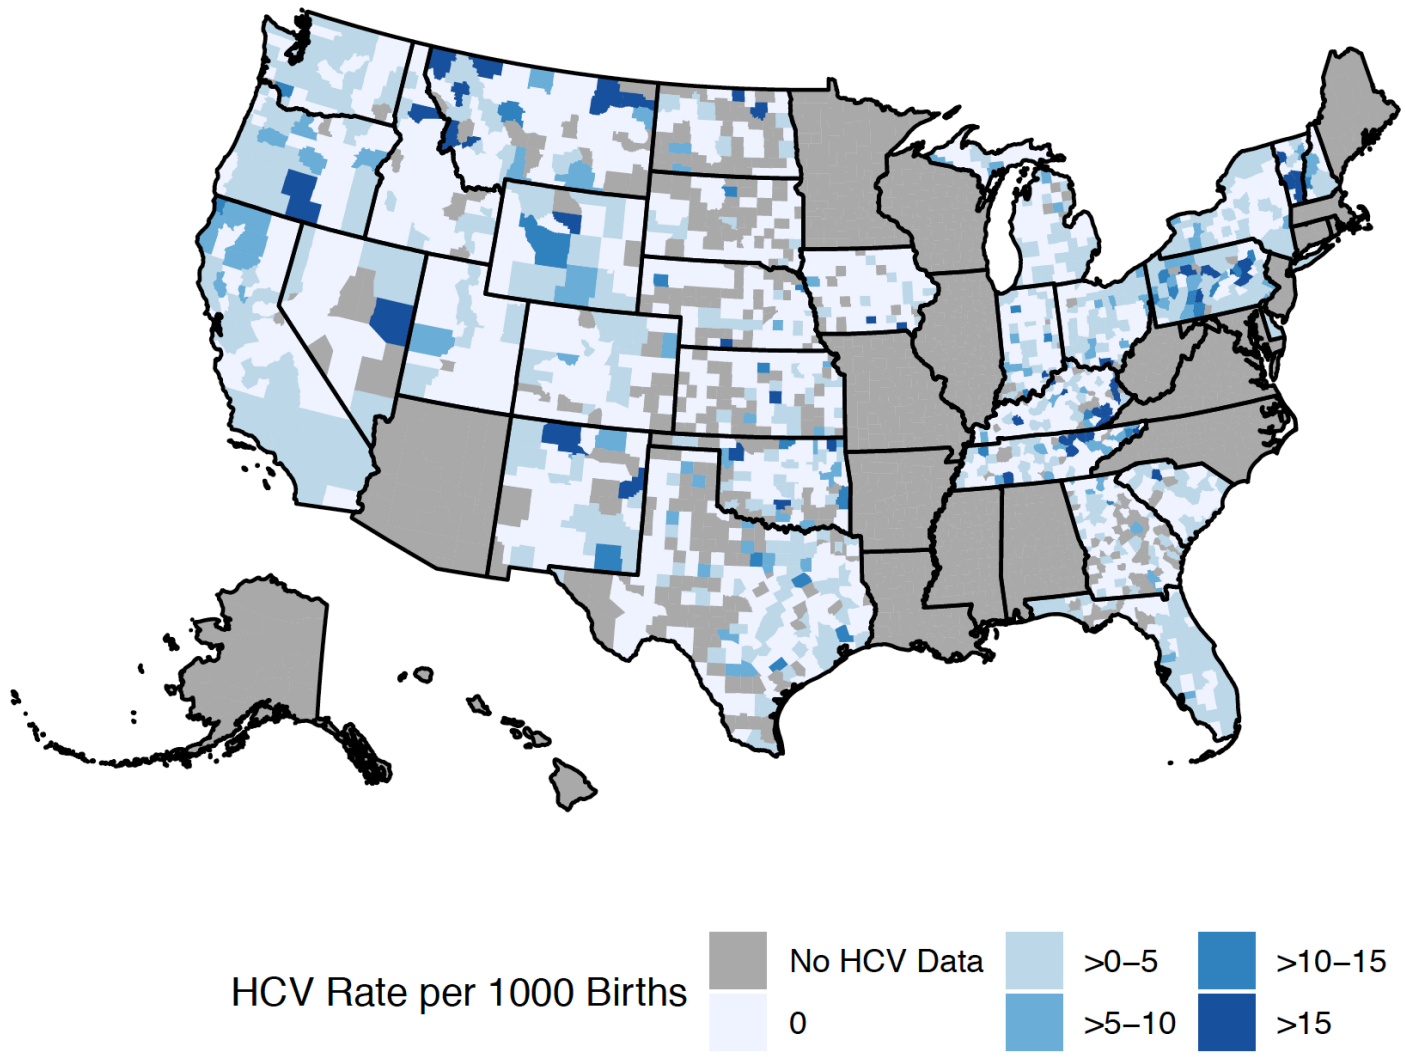

**eFigure 3.** County Geographic Variation in Hepatitis C Infections Among Pregnant People, US 2010.

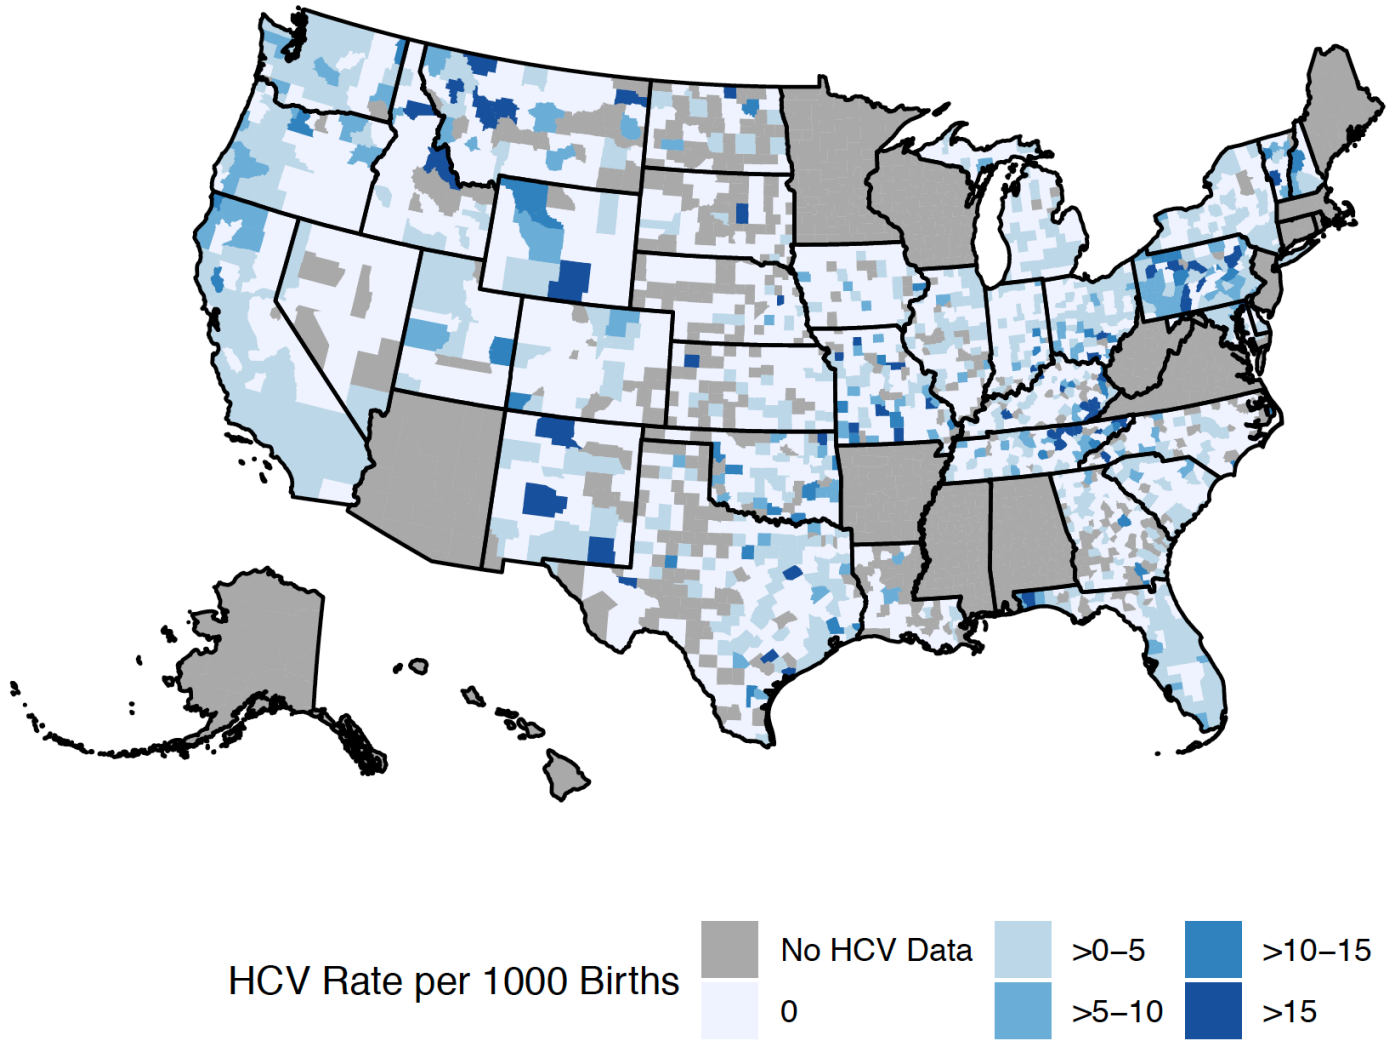

**eFigure 4.** County Geographic Variation in Hepatitis C Infections Among Pregnant People, US 2011.

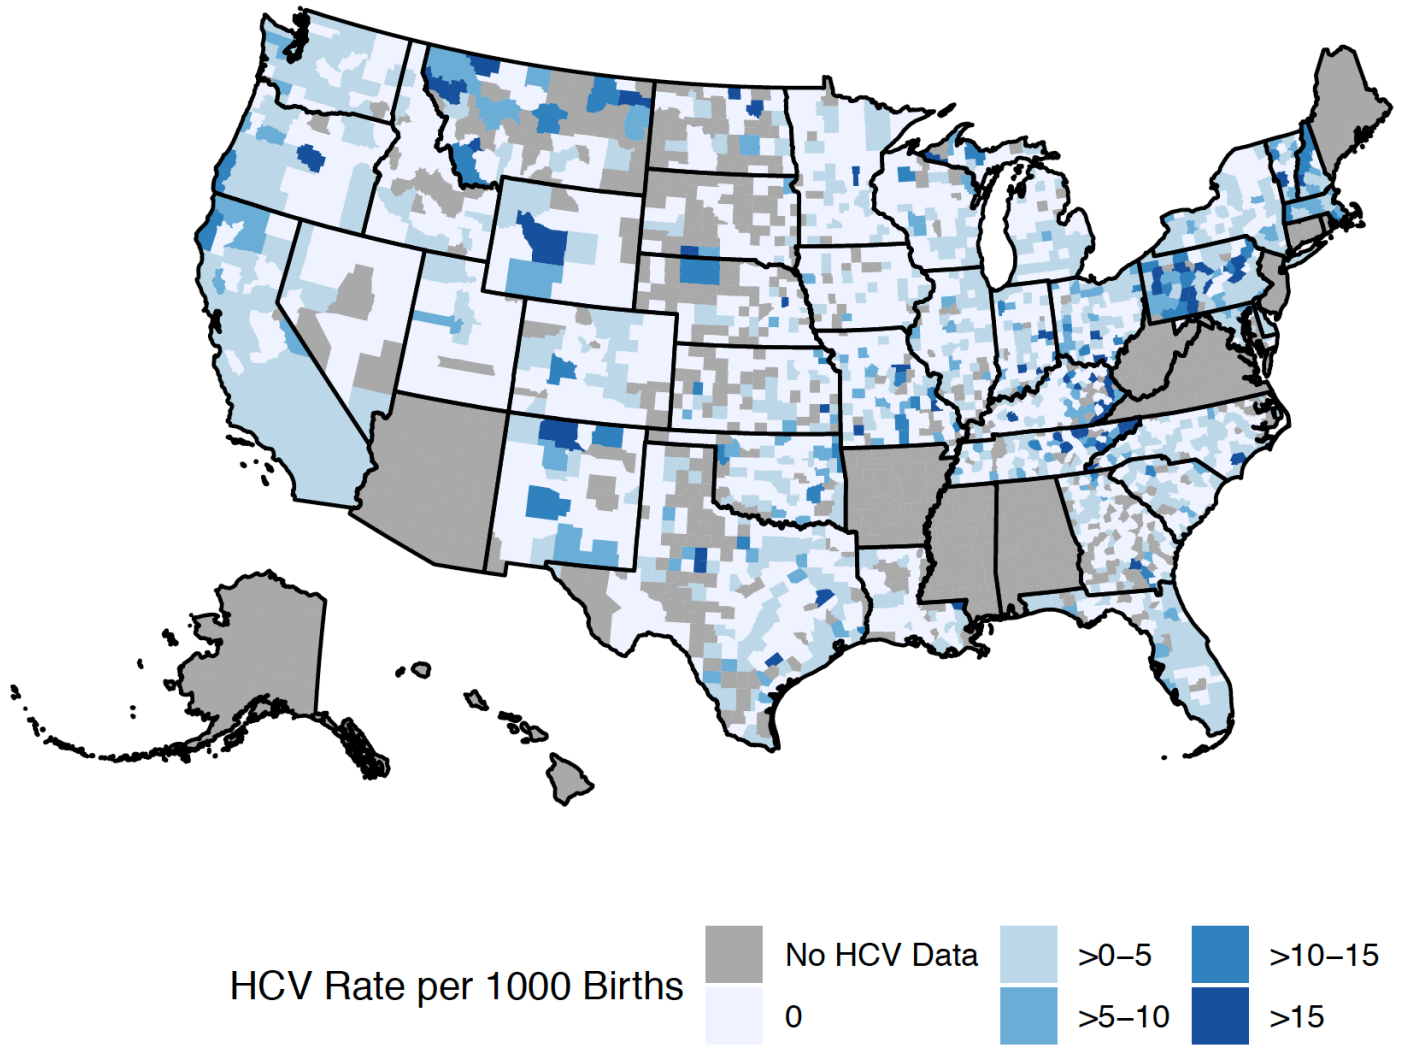

**eFigure 5.** County Geographic Variation in Hepatitis C Infections Among Pregnant People, US 2012.

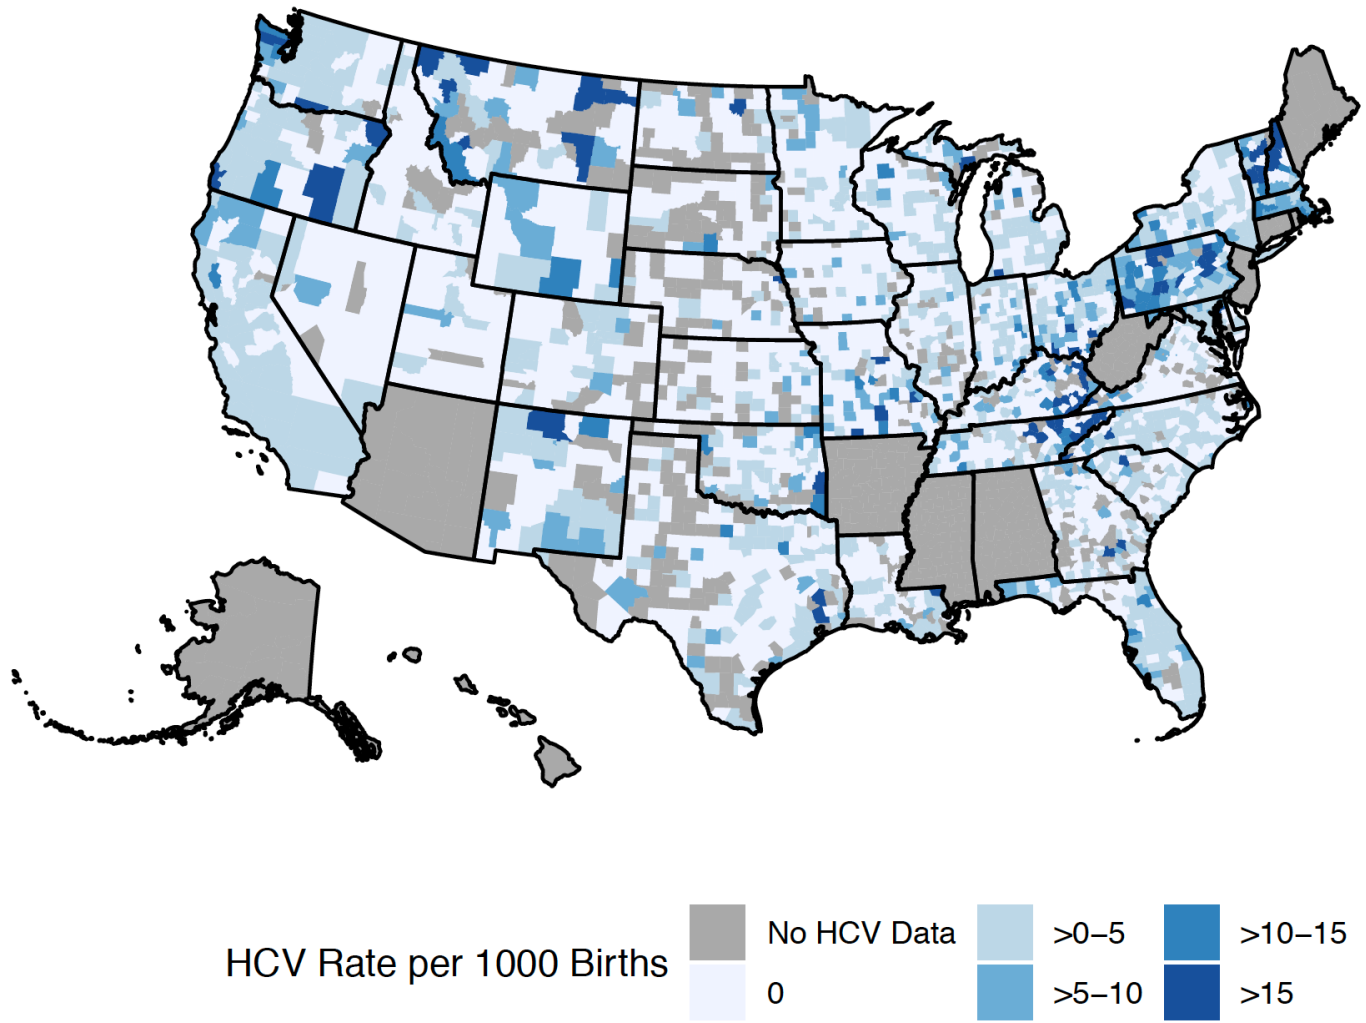



**eFigure 6.** County Geographic Variation in Hepatitis C Infections Among Pregnant People, US 2013.

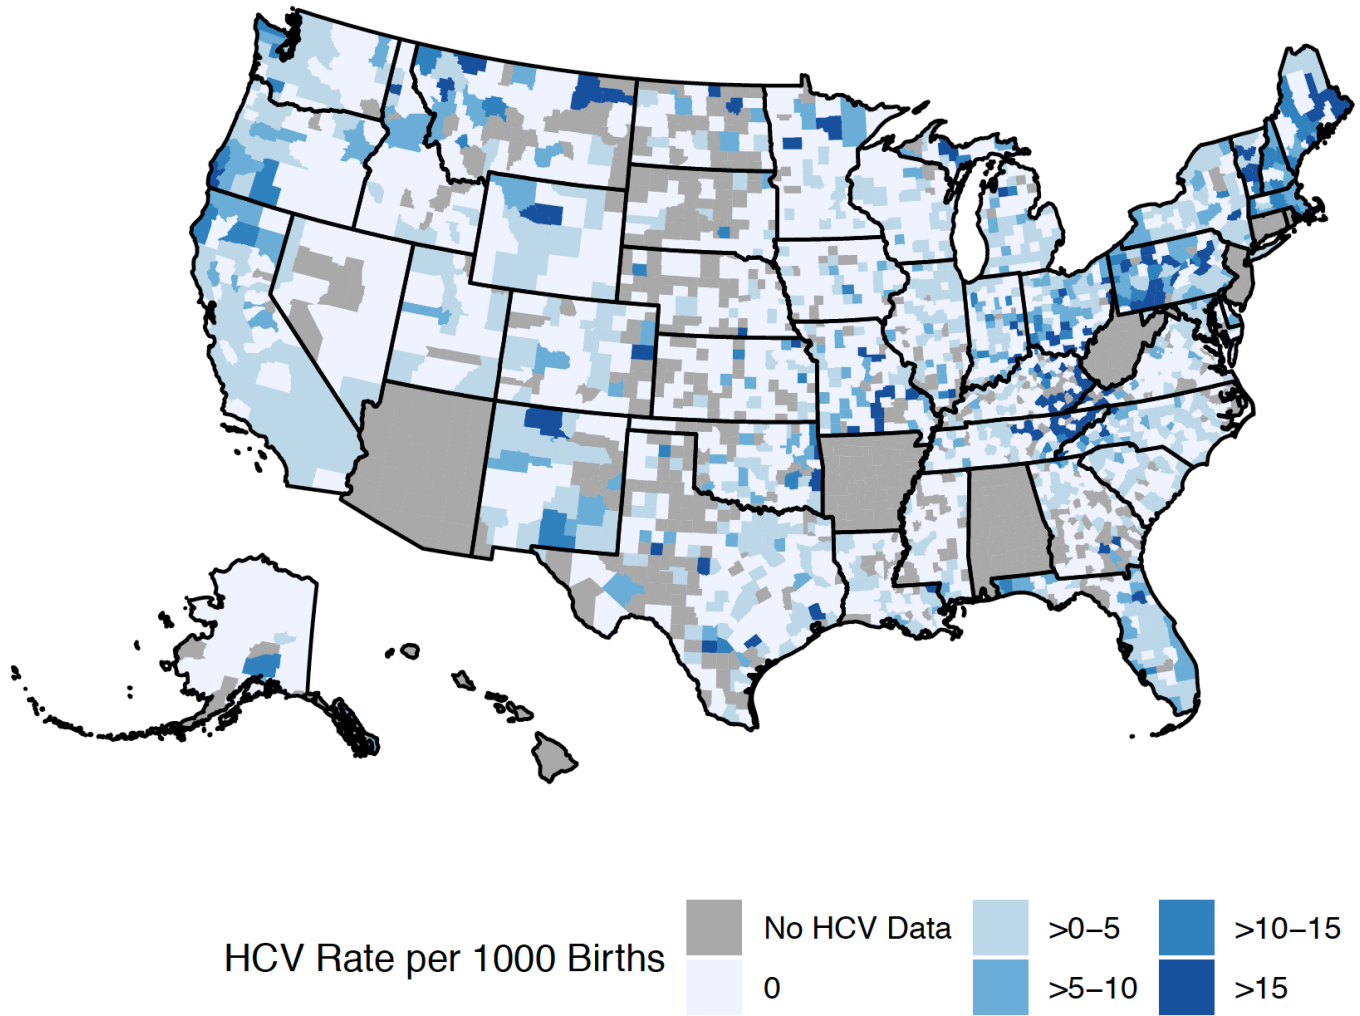

**eFigure 7.** County Geographic Variation in Hepatitis C Infections Among Pregnant People, US 2014.

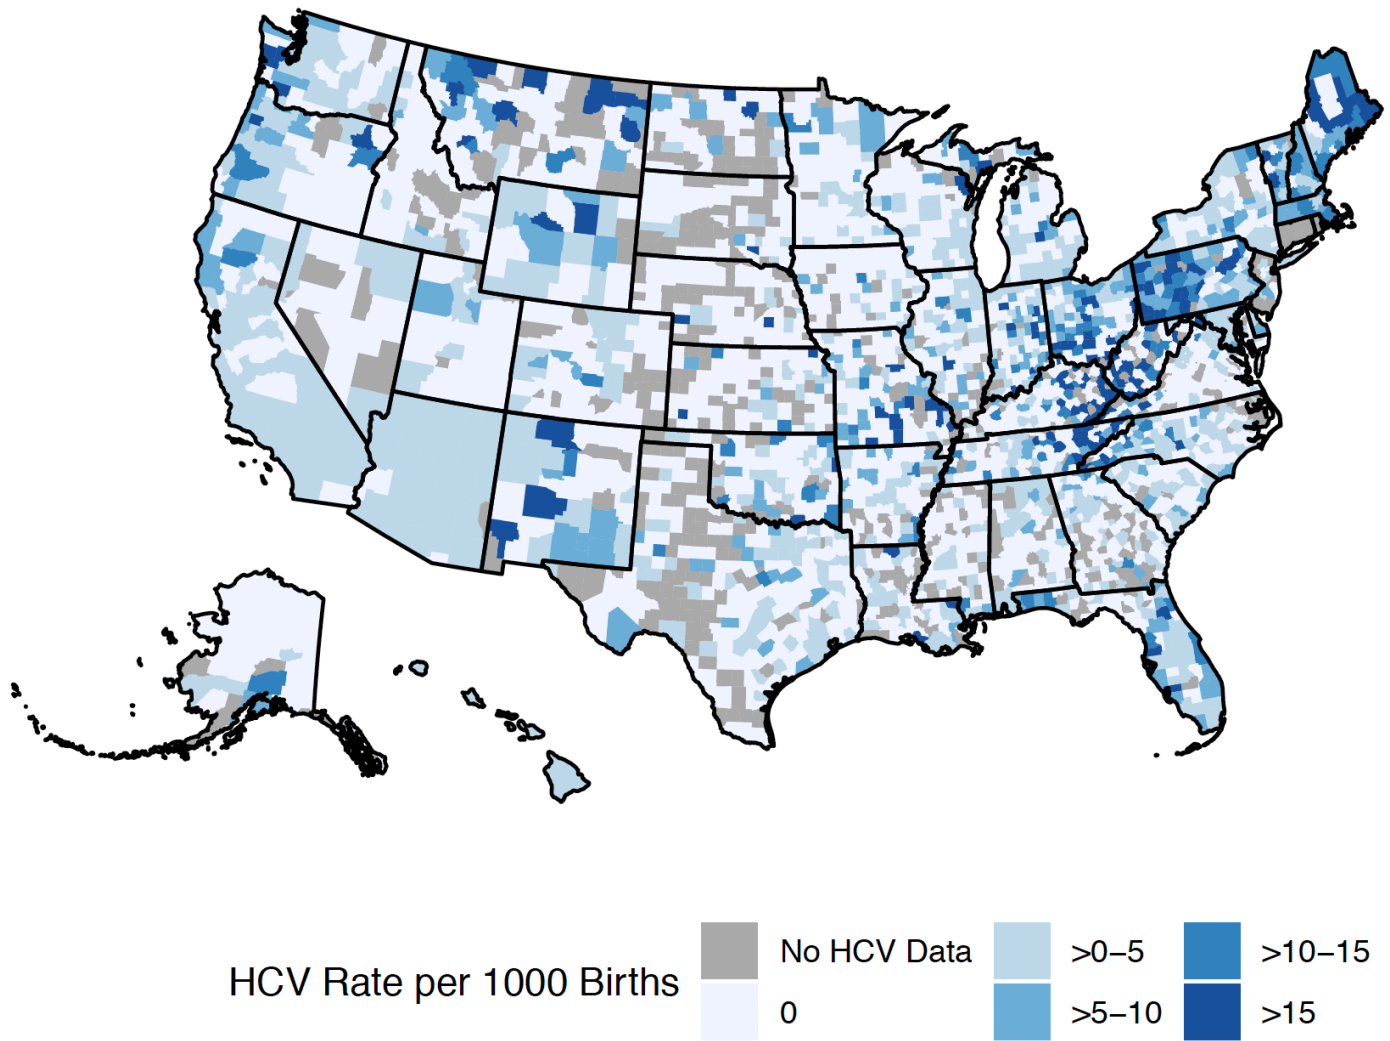

**eFigure 8.** County Geographic Variation in Hepatitis C Infections Among Pregnant People, US 2015.

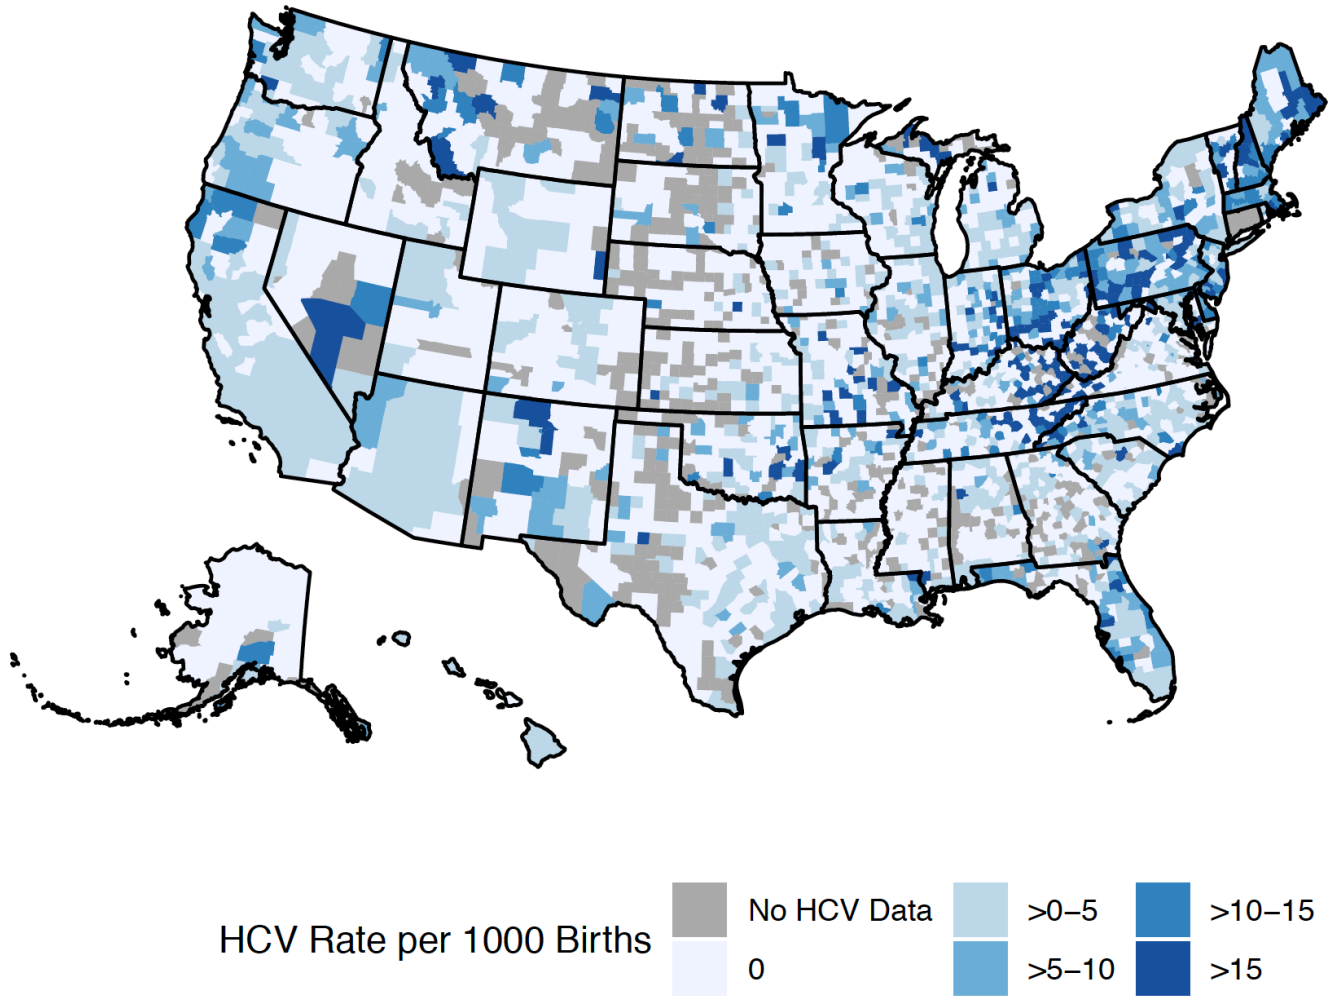

**eFigure 9.** County Geographic Variation in Hepatitis C Infections Among Pregnant People, US 2016.

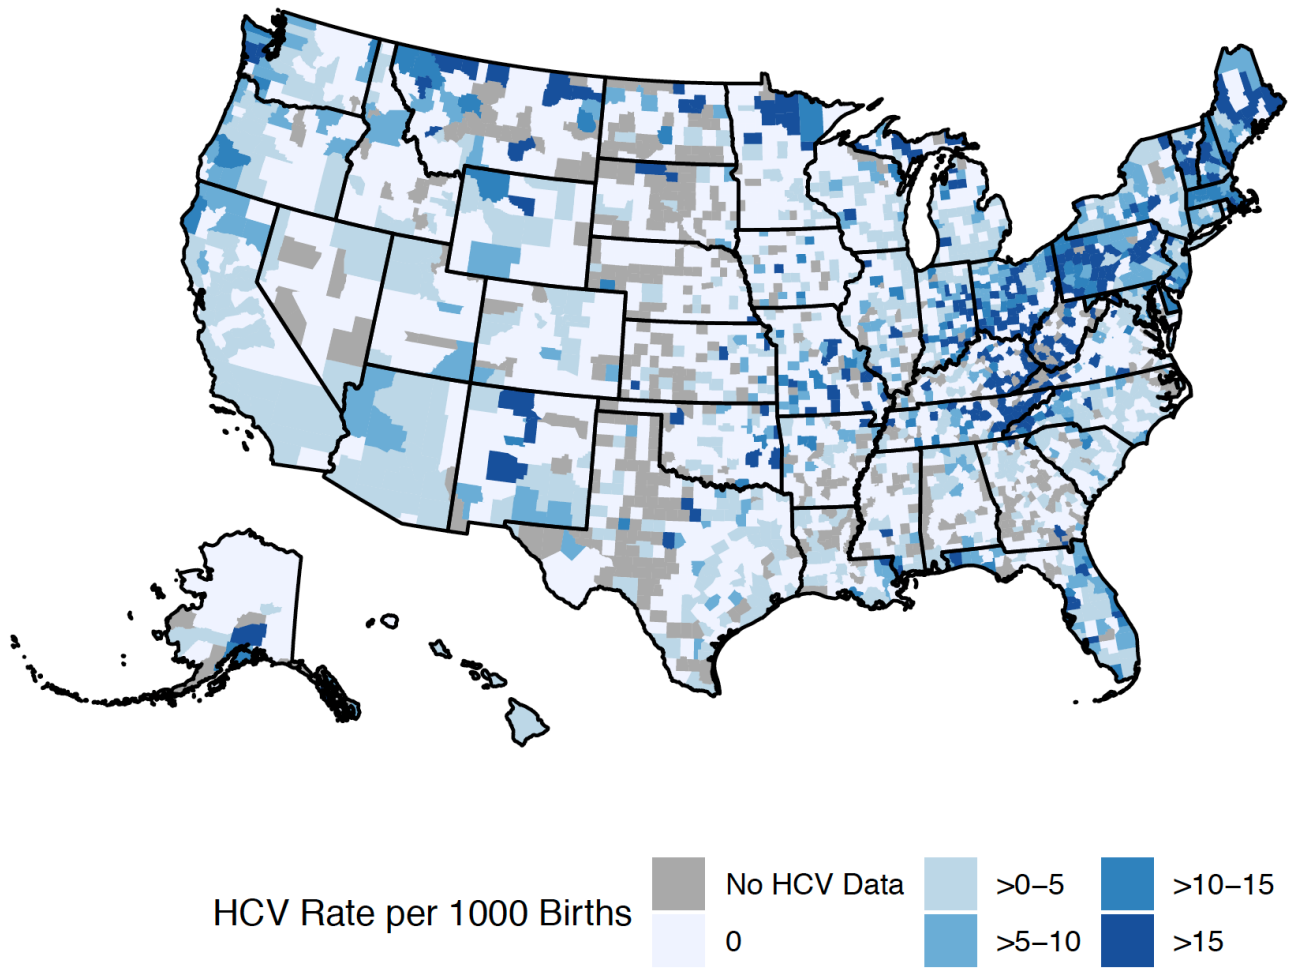

**eFigure 10.** County Geographic Variation in Hepatitis C Infections Among Pregnant People, US 2017.

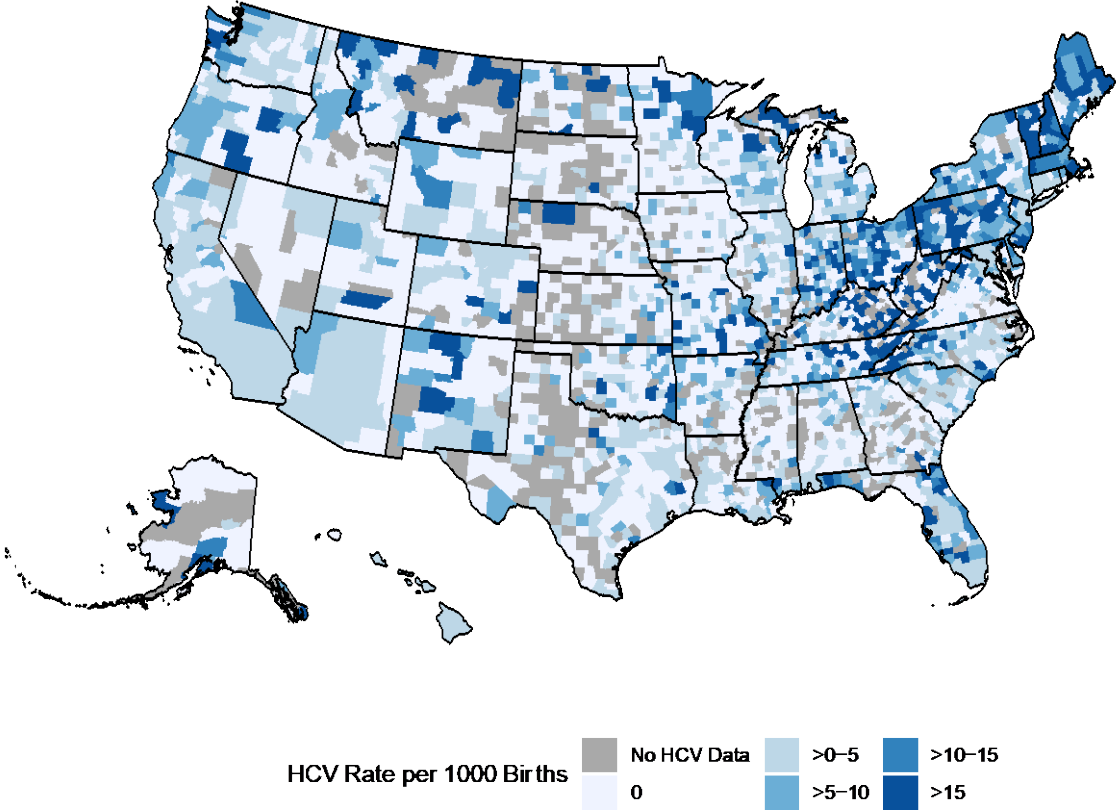

**eFigure 11.** County Geographic Variation in Hepatitis C Infections Among Pregnant People, US 2018.

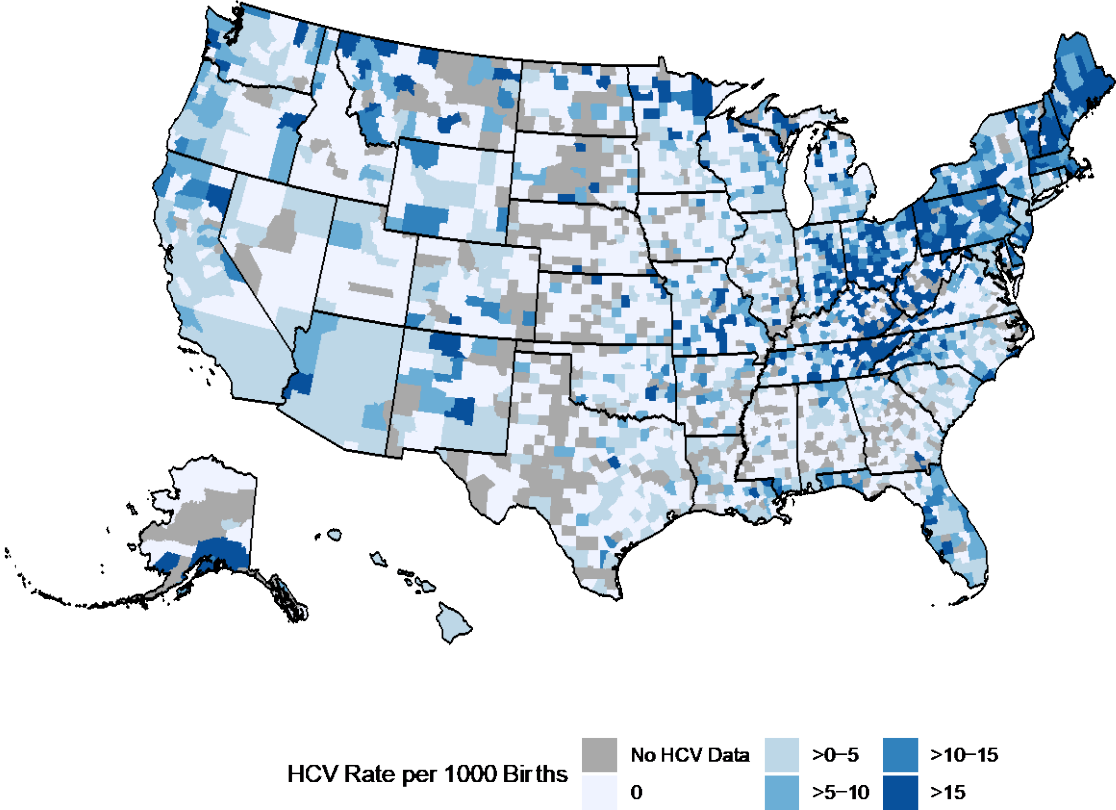

Supplement: jamahealthforum-e213470-s001.pdf [file jamahealthforum-e213470-s001.pdf]
